# Supplementary material for: The bipartite mitochondrial genome of Ruizia karukerae (Rhigonematomorpha, Nematoda)
Source: PubMed Central journal article supplement (PMC5945635; doi:10.1038/s41598-018-25759-0), 2018-05-10
Supplement: 41598_2018_25759_MOESM1_ESM.pdf [file 41598_2018_25759_MOESM1_ESM.pdf]

Supplementary information

**The bipartite mitochondrial genome of *Ruizia karukerae*  
(Rhigonematomorpha, Nematoda)**

**Taeho Kim<sup>1</sup>, Elizabeth Kern<sup>2</sup>, Chungoo Park<sup>3</sup>, Steven A. Nadler<sup>4</sup>, Yeon Jae Bae<sup>1</sup> &  
Joong-Ki Park<sup>2</sup>**

<sup>1</sup>Division of Environmental Science and Ecological Engineering, College of Life Sciences and Biotechnology, Korea University, Seoul 02841, Republic of Korea

<sup>2</sup>Division of EcoScience, Ewha Womans University, 52 Ewhayeodae-gil, Seodamun-gu, Seoul 03760, Republic of Korea

<sup>3</sup>School of Biological Sciences and Technology, Chonnam National University, Gwangju 61186, Republic of Korea

<sup>4</sup>Department of Entomology and Nematology, University of California, Davis, CA 95616, USA

\*Corresponding author

Joong-Ki Park

Address: Division of EcoScience, Ewha Womans University, 52 Ewhayeodae-gil, Seodamun-gu, Seoul 03760, Republic of Korea.

E-mail: [jkpark@ewha.ac.kr](mailto:jkpark@ewha.ac.kr)

Supplementary Table S1. Genetic code and codon usage for the mitochondrial protein coding genes of *Ruizia karukerae*.

| Codon               | AA  | No. | %     | Codon | AA  | No. | %    | Codon                | AA  | No. | %     | Codon | AA  | No. | %    |
|---------------------|-----|-----|-------|-------|-----|-----|------|----------------------|-----|-----|-------|-------|-----|-----|------|
| <b>Chromosome I</b> |     |     |       |       |     |     |      | <b>Chromosome II</b> |     |     |       |       |     |     |      |
| TTT                 | Phe | 183 | 11.28 | TAT   | Tyr | 75  | 4.62 | TTT                  | Phe | 229 | 11.30 | TAT   | Tyr | 104 | 5.13 |
| TTC                 | Phe | 18  | 1.11  | TAC   | Tyr | 22  | 1.36 | TTC                  | Phe | 35  | 1.73  | TAC   | Tyr | 23  | 1.13 |
| TTA                 | Leu | 137 | 8.44  | TAA   | *   | 5   | 0.31 | TTA                  | Leu | 201 | 9.92  | TAA   | *   | 3   | 0.15 |
| TTG                 | Leu | 51  | 3.14  | TAG   | *   | 0   | 0.00 | TTG                  | Leu | 60  | 2.96  | TAG   | *   | 2   | 0.10 |
| CTT                 | Leu | 18  | 1.11  | CAT   | His | 24  | 1.48 | CTT                  | Leu | 17  | 0.84  | CAT   | His | 30  | 1.48 |
| CTC                 | Leu | 5   | 0.31  | CAC   | His | 2   | 0.12 | CTC                  | Leu | 3   | 0.15  | CAC   | His | 1   | 0.05 |
| CTA                 | Leu | 22  | 1.36  | CAA   | Gln | 9   | 0.55 | CTA                  | Leu | 20  | 0.99  | CAA   | Gln | 10  | 0.49 |
| CTG                 | Leu | 7   | 0.43  | CAG   | Gln | 7   | 0.43 | CTG                  | Leu | 9   | 0.44  | CAG   | Gln | 21  | 1.04 |
| ATT                 | Ile | 100 | 6.16  | AAT   | Asn | 58  | 3.57 | ATT                  | Ile | 146 | 7.20  | AAT   | Asn | 60  | 2.96 |
| ATC                 | Ile | 18  | 1.11  | AAC   | Asn | 5   | 0.31 | ATC                  | Ile | 22  | 1.09  | AAC   | Asn | 10  | 0.49 |
| ATA                 | Met | 78  | 4.81  | AAA   | Lys | 28  | 1.73 | ATA                  | Met | 96  | 4.74  | AAA   | Lys | 41  | 2.02 |
| ATG                 | Met | 32  | 1.97  | AAG   | Lys | 15  | 0.92 | ATG                  | Met | 24  | 1.18  | AAG   | Lys | 11  | 0.54 |
| GTT                 | Val | 55  | 3.39  | GAT   | Asp | 28  | 1.73 | GTT                  | Val | 74  | 3.65  | GAT   | Asp | 20  | 0.99 |
| GTC                 | Val | 7   | 0.43  | GAC   | Asp | 8   | 0.49 | GTC                  | Val | 8   | 0.39  | GAC   | Asp | 5   | 0.25 |
| GTA                 | Val | 46  | 2.83  | GAA   | Glu | 20  | 1.23 | GTA                  | Val | 58  | 2.86  | GAA   | Glu | 29  | 1.43 |
| GTG                 | Val | 24  | 1.48  | GAG   | Glu | 11  | 0.68 | GTG                  | Val | 35  | 1.73  | GAG   | Glu | 30  | 1.48 |
| TCT                 | Ser | 58  | 3.57  | TGT   | Cys | 17  | 1.05 | TCT                  | Ser | 77  | 3.80  | TGT   | Cys | 18  | 0.89 |
| TCC                 | Ser | 6   | 0.37  | TGC   | Cys | 0   | 0.00 | TCC                  | Ser | 5   | 0.25  | TGC   | Cys | 0   | 0.00 |
| TCA                 | Ser | 5   | 0.31  | TGA   | Trp | 25  | 1.54 | TCA                  | Ser | 9   | 0.44  | TGA   | Trp | 26  | 1.28 |
| TCG                 | Ser | 6   | 0.37  | TGG   | Trp | 15  | 0.92 | TCG                  | Ser | 6   | 0.30  | TGG   | Trp | 23  | 1.13 |
| CCT                 | Pro | 25  | 1.54  | CGT   | Arg | 11  | 0.68 | CCT                  | Pro | 36  | 1.78  | CGT   | Arg | 19  | 0.94 |
| CCC                 | Pro | 1   | 0.06  | CGC   | Arg | 0   | 0.00 | CCC                  | Pro | 2   | 0.10  | CGC   | Arg | 0   | 0.00 |
| CCA                 | Pro | 6   | 0.37  | CGA   | Arg | 0   | 0.00 | CCA                  | Pro | 7   | 0.35  | CGA   | Arg | 1   | 0.05 |
| CCG                 | Pro | 1   | 0.06  | CGG   | Arg | 3   | 0.18 | CCG                  | Pro | 3   | 0.15  | CGG   | Arg | 2   | 0.10 |
| ACT                 | Thr | 38  | 2.34  | AGT   | Ser | 45  | 2.77 | ACT                  | Thr | 48  | 2.37  | AGT   | Ser | 49  | 2.42 |
| ACC                 | Thr | 3   | 0.18  | AGC   | Ser | 13  | 0.80 | ACC                  | Thr | 4   | 0.20  | AGC   | Ser | 18  | 0.89 |
| ACA                 | Thr | 10  | 0.62  | AGA   | Ser | 39  | 2.40 | ACA                  | Thr | 10  | 0.49  | AGA   | Ser | 43  | 2.12 |
| ACG                 | Thr | 1   | 0.06  | AGG   | Ser | 18  | 1.11 | ACG                  | Thr | 5   | 0.25  | AGG   | Ser | 22  | 1.09 |
| GCT                 | Ala | 27  | 1.66  | GGT   | Gly | 57  | 3.51 | GCT                  | Ala | 26  | 1.28  | GGT   | Gly | 45  | 2.22 |
| GCC                 | Ala | 5   | 0.31  | GGC   | Gly | 3   | 0.18 | GCC                  | Ala | 10  | 0.49  | GGC   | Gly | 8   | 0.39 |
| GCA                 | Ala | 6   | 0.37  | GGA   | Gly | 31  | 1.91 | GCA                  | Ala | 7   | 0.35  | GGA   | Gly | 23  | 1.13 |
| GCG                 | Ala | 7   | 0.43  | GGG   | Gly | 23  | 1.42 | GCG                  | Ala | 5   | 0.25  | GGG   | Gly | 33  | 1.63 |

\* Termination codon

Supplementary Table S2. Nucleotide composition of the mitochondrial genome of *Ruizia karukerae*.

| Nucleotide sequence     | Length (bp)         | A (%) | C (%) | G (%) | T (%) | A+T (%) | G+C (%) | Length (bp)          | A (%) | C (%) | G (%) | T (%) | A+T (%) | G+C (%) |
|-------------------------|---------------------|-------|-------|-------|-------|---------|---------|----------------------|-------|-------|-------|-------|---------|---------|
|                         | <b>Chromosome I</b> |       |       |       |       |         |         | <b>Chromosome II</b> |       |       |       |       |         |         |
| Entire sequence         | 7,659               | 29.0  | 9.5   | 16.8  | 44.7  | 73.7    | 26.3    | 7,647                | 27.5  | 9.8   | 17.2  | 45.5  | 73.0    | 27.0    |
| Protein coding sequence | 4,854               | 26.3  | 9.5   | 18.1  | 46.1  | 72.4    | 27.6    | 6,066                | 26.1  | 9.8   | 17.1  | 26.9  | 73.1    | 26.9    |
| Codon position*         |                     |       |       |       |       |         |         |                      |       |       |       |       |         |         |
| 1 <sup>st</sup>         | 1,618               | 31.0  | 8.7   | 22.1  | 38.2  | 69.2    | 30.8    | 2,022                | 30.1  | 9.0   | 20.6  | 40.4  | 70.5    | 29.5    |
| 2 <sup>nd</sup>         | 1,618               | 19.3  | 12.7  | 18.5  | 49.5  | 68.8    | 31.2    | 2,022                | 19.5  | 12.9  | 16.3  | 51.3  | 70.8    | 29.2    |
| 3 <sup>rd</sup>         | 1,618               | 28.6  | 7.2   | 13.7  | 50.6  | 79.1    | 20.9    | 2,022                | 28.7  | 7.6   | 14.3  | 49.4  | 78.1    | 21.9    |
| Ribosomal RNA gene      | 1,631               | 35.4  | 8.3   | 14.1  | 42.1  | 77.6    | 22.4    | -                    | -     | -     | -     | -     | -       | -       |
| Transfer RNA gene       | 506                 | 33.4  | 11.1  | 15.2  | 40.3  | 73.7    | 26.3    | 910                  | 34.0  | 8.5   | 18.2  | 39.3  | 73.3    | 26.7    |
| Non-coding region       | 471                 | 27.0  | 11.5  | 15.5  | 46.1  | 73.0    | 27.0    | 489                  | 30.3  | 11.7  | 17.8  | 40.3  | 70.6    | 29.4    |

\*Termination codons were not included

## Chromosome I

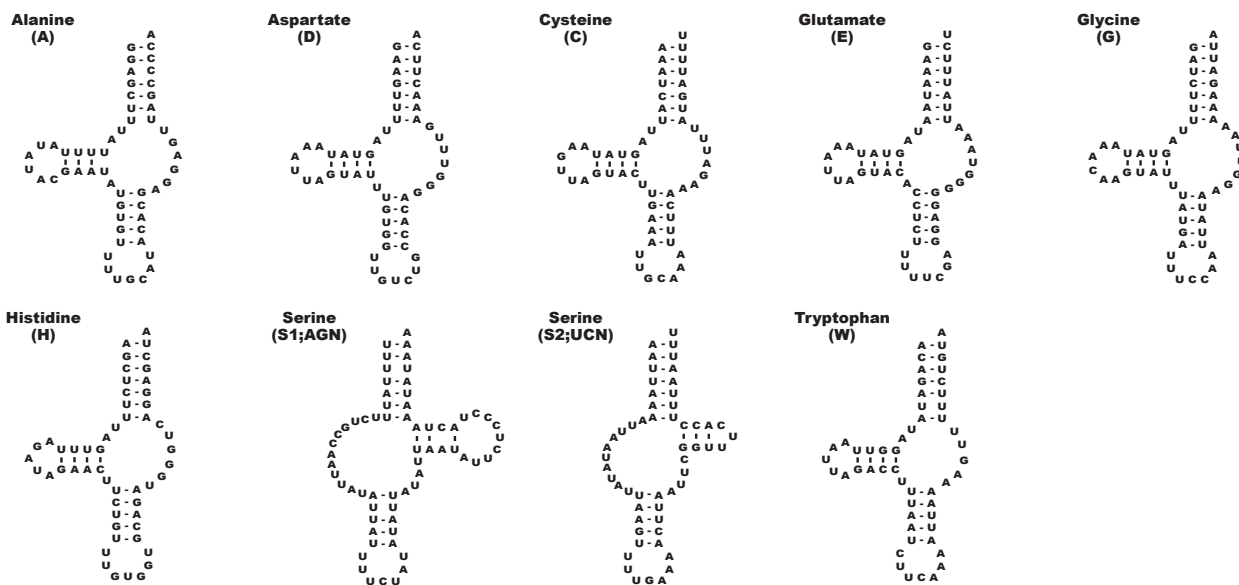

## Chromosome II

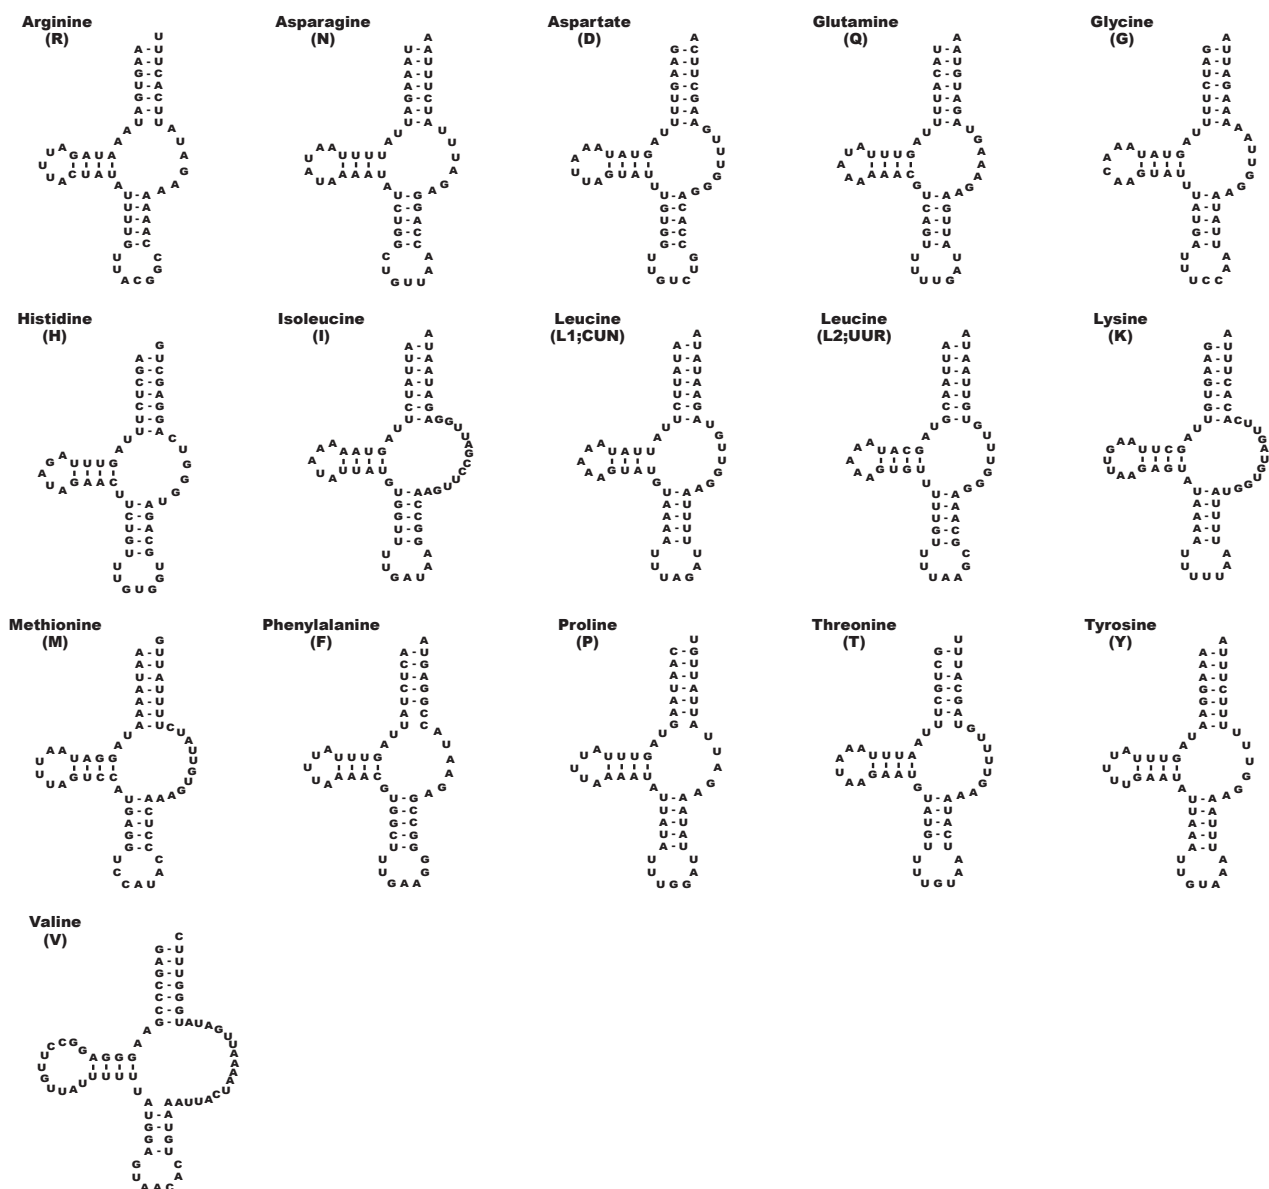

Supplementary Figure S1. Putative secondary structures of the 25 mitochondrial tRNAs of *Ruizia karukerae*. *trnD*, *trnG* and *trnH* are present on both chromosomes.
